# Supplementary material for: Electrocatalytic Reduction of CO2 to CO by Molecular Cobalt–Polypyridine Diamine Complexes
Source: MDPI journal article supplement (doi:10.3390/molecules29081694), 2024-04-09
Supplement: s1 [file s1]

## *Supporting Information for*

# Electrocatalytic Reduction of CO<sub>2</sub> to CO by Molecular Cobalt Poly-Pyridine-Diamine Complexes

Yong Yang,<sup>\*a</sup> Fang Xie,<sup>a</sup> Jiahui Chen,<sup>a</sup> Si Qiu,<sup>a</sup> Na Qiang,<sup>a</sup> Ming Lu,<sup>a</sup> Zhongli Peng,<sup>a</sup> Jing Yang,<sup>\*b</sup> and Guocong Liu,<sup>\*a</sup>

a School of Chemistry and Materials Engineering, Huizhou University, Huizhou, Guangdong 516001, China.

b College of Health Science and Environmental Engineering, Shenzhen Technology University, Shenzhen 518118, China.

### **Corresponding Authors**

Email\*: yangyongself@hzu.edu.cn

Email\*: yangjing2@sztu.edu.cn

Email\*: gcl\_109@163.com

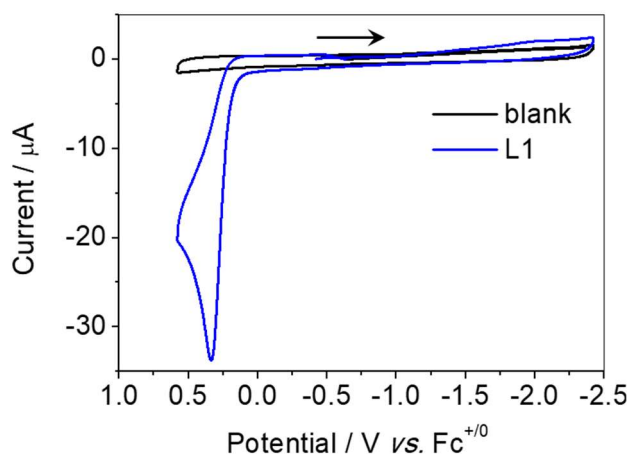

**Figure S1.** Cyclic voltammogram of ligand  $L^1$  (1.0 mM) in  $n\text{Bu}_4\text{NPF}_6$  acetonitrile solution (0.1 M) with a scan rate of 100 mV/s.

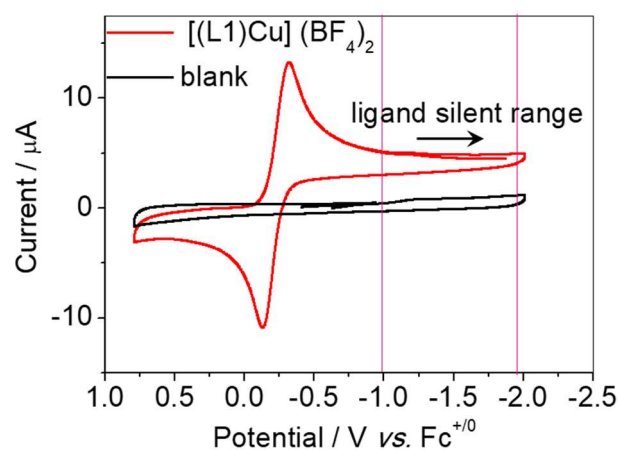

**Figure S2.** Cyclic voltammogram of complex  $[\text{Cu}(L^1)](\text{BF}_4)_2$  (1.0 mM) in  $n\text{Bu}_4\text{NPF}_6$  acetonitrile solution (0.1 M) with a scan rate of 100 mV/s.

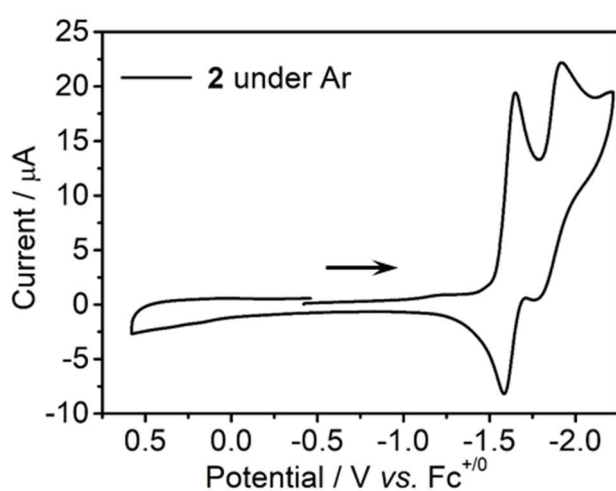

**Figure S3.** Cyclic voltammograms of complex **2** (1.0 mM) in  $n\text{Bu}_4\text{NPF}_6$  acetonitrile solution (0.1 M) with a scan rate of 100 mV/s.

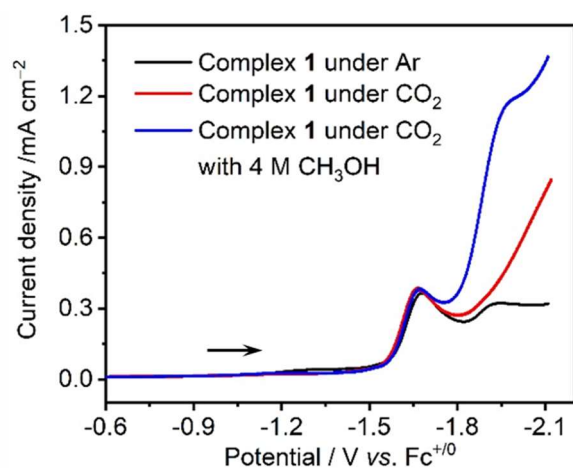

**Figure S4.** LSV curves of complex **1** (1.0 mM) in acetonitrile solution (0.1 M  $n\text{-Bu}_4\text{NPF}_6$ ) with a scan rate of 100 mV/s.

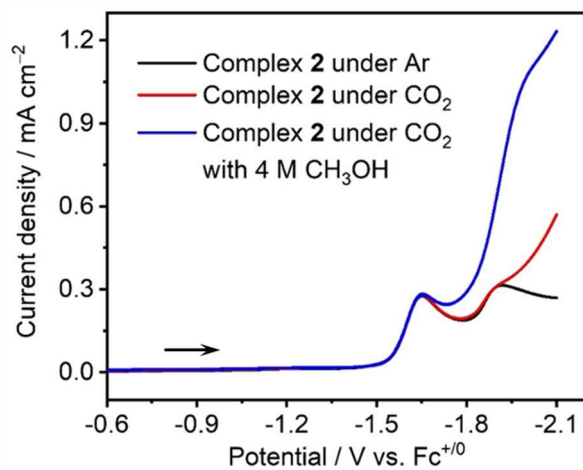

**Figure S5.** LSV curves of complex **2** (1.0 mM) in acetonitrile solution (0.1 M  $n\text{-Bu}_4\text{NPF}_6$ ) with a scan rate of 100 mV/s.

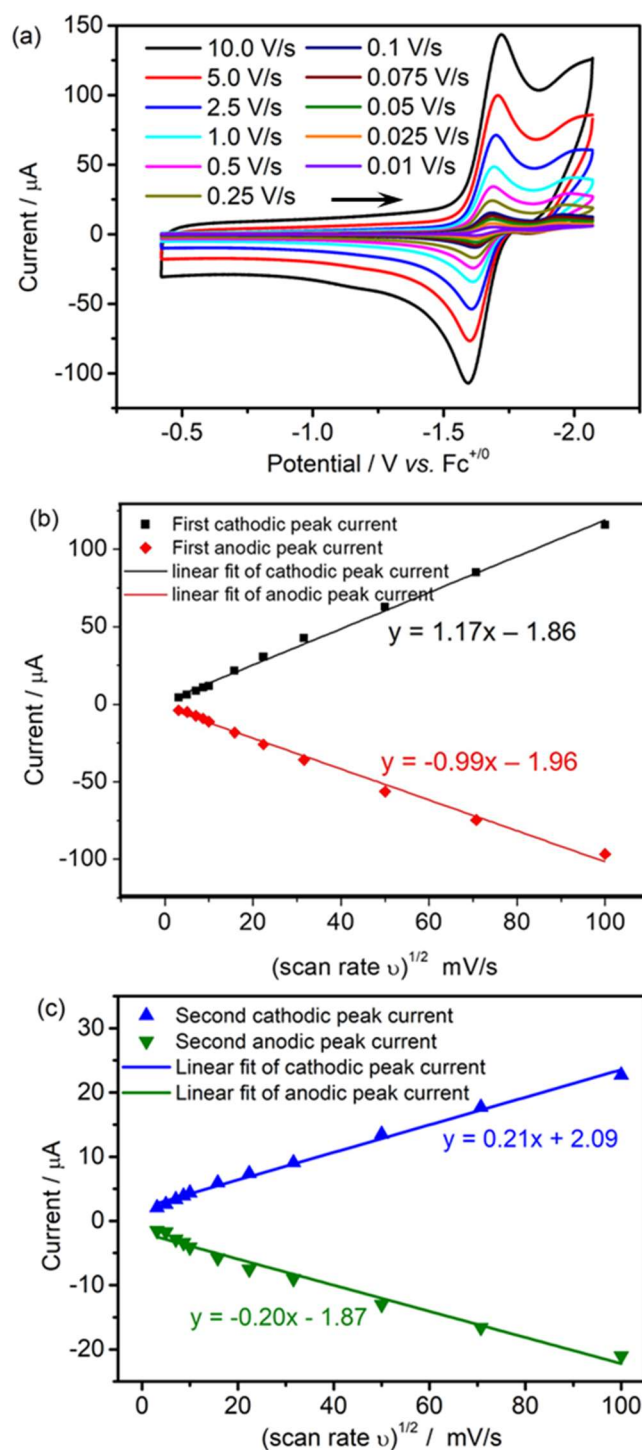

**Figure S6.** (a) The  $\text{Co}^{\text{II/I}}$  and  $\text{Co}^{\text{I/0}}$  couple of complex 1 (1 mM) in  $n\text{Bu}_4\text{NPF}_6$  (0.1 M) acetonitrile solution with scan rate varied from 0.01 V/s to 10 V/s under Ar; (b) Plot of cathodic and anodic peak current ( $i_p$ ) vs.  $v^{1/2}$  for the first redox couple of complex 1. (c) Plot of cathodic and anodic peak current ( $i_p$ ) vs.  $v^{1/2}$  for the second redox couple of complex 1.

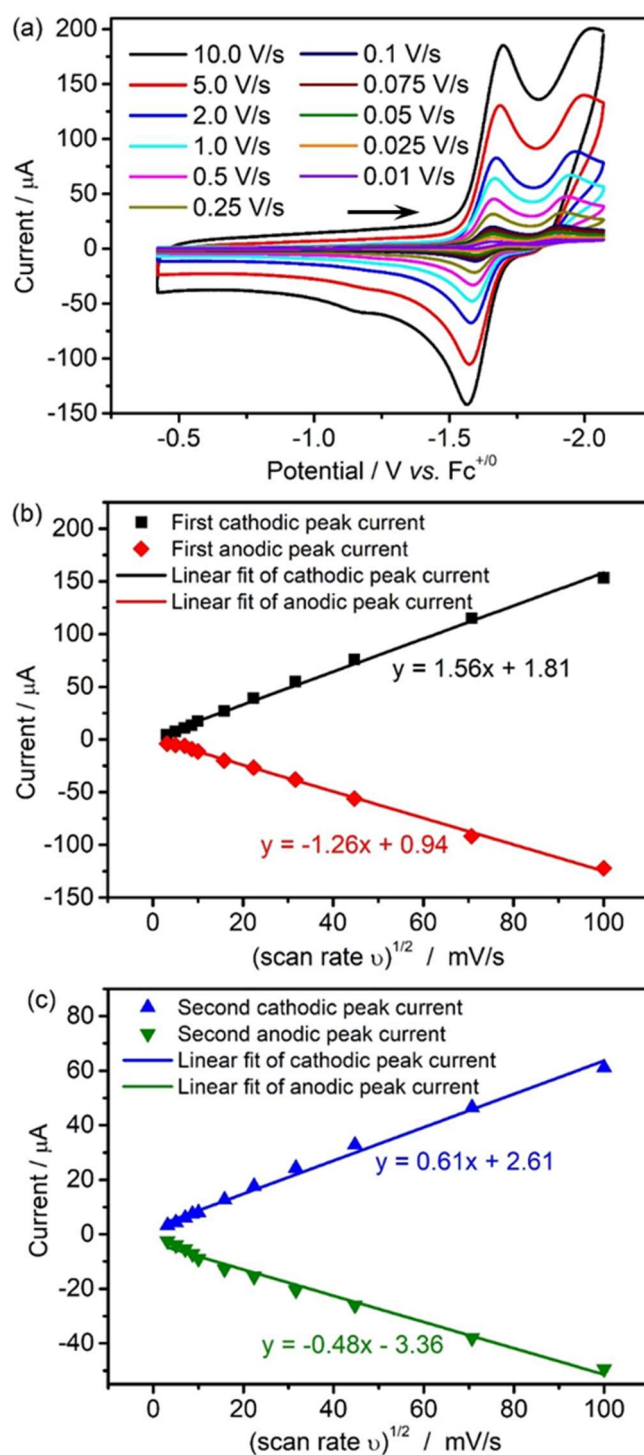

**Figure S7.** (a) The  $\text{Co}^{\text{II/I}}$  and  $\text{Co}^{\text{I/0}}$  couple of complex 2 (1 mM) in  $n\text{Bu}_4\text{NPF}_6$  (0.1 M) acetonitrile solution with scan rate varied from 0.01 V/s to 10 V/s under Ar; (b) Plot of cathodic and anodic peak current ( $i_p$ ) vs.  $v^{1/2}$  for the first redox couple of complex 2. (c) Plot of cathodic and anodic peak current ( $i_p$ ) vs.  $v^{1/2}$  for the second redox couple of complex 2.

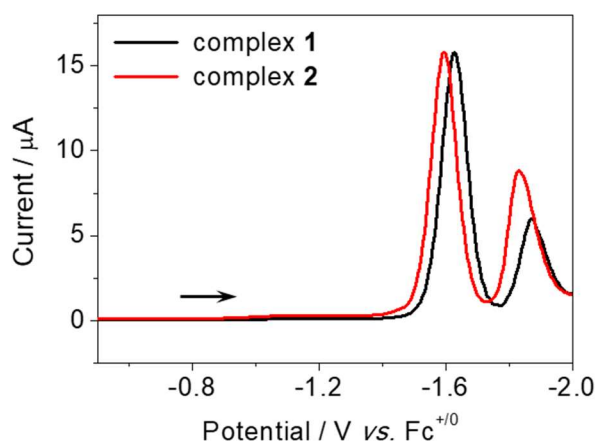

**Figure S8.** Differential pulse voltammograms of complexes **1** and **2** (1.0 mM) in  $n\text{Bu}_4\text{NPF}_6$  acetonitrile solution (0.1 M) at a scan rate of  $4 \text{ mV s}^{-1}$ .

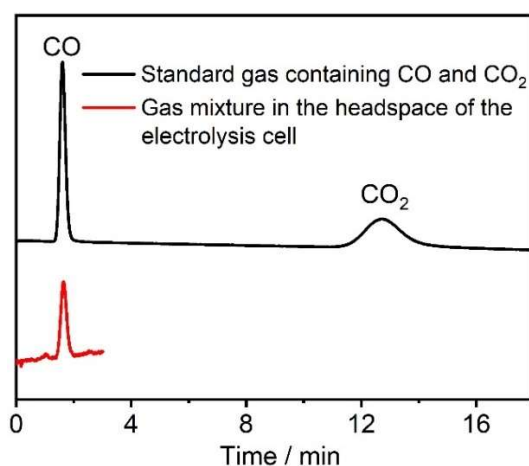

**Figure S9.** Gas chromatography analysis of the standard gas containing CO and  $\text{CO}_2$  (black line) and gas mixture in the headspace of the electrolysis cell (red line, controlled potential electrolysis of complex **1** in acetonitrile solution under  $\text{CO}_2$  at  $-1.9 \text{ V}$  for half an hour).

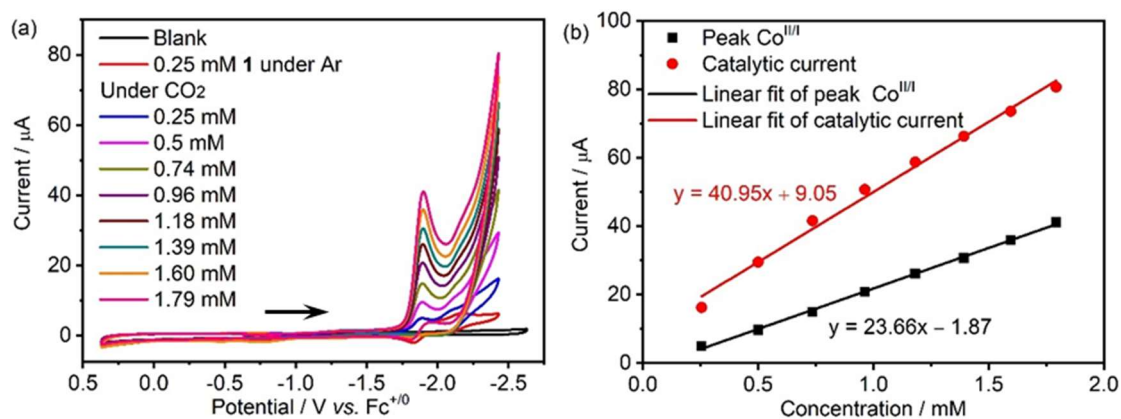

**Figure S10.** (a) Cyclic voltammograms of complex **1** in  $\text{CO}_2$  saturated acetonitrile solution with **1** concentration varied from 0.25 to 1.79 mM at a scan rate of  $100 \text{ mV s}^{-1}$ . (b) Plot of the reduction current maximum of  $\text{Co}^{\text{II/I}}$  couple and catalytic current maximum as a function of catalyst concentration.

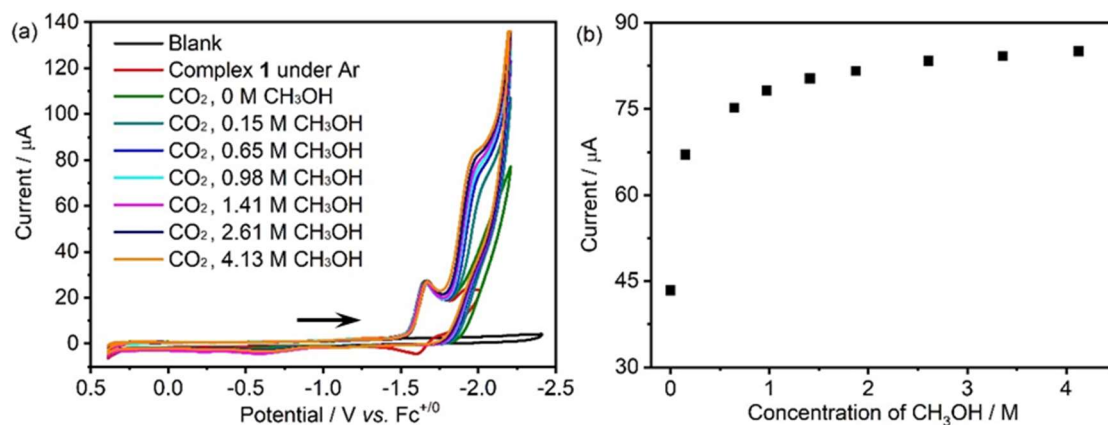

**Figure S11.** (a) Cyclic voltammogram of complex 1 (1.0 mM) in CH<sub>3</sub>CN solution with the presence of varying concentration of CH<sub>3</sub>OH at a scan rate of 100 mV/s under CO<sub>2</sub>; (b) The trend of catalytic peak current with increasing methanol concentration at -2 V.

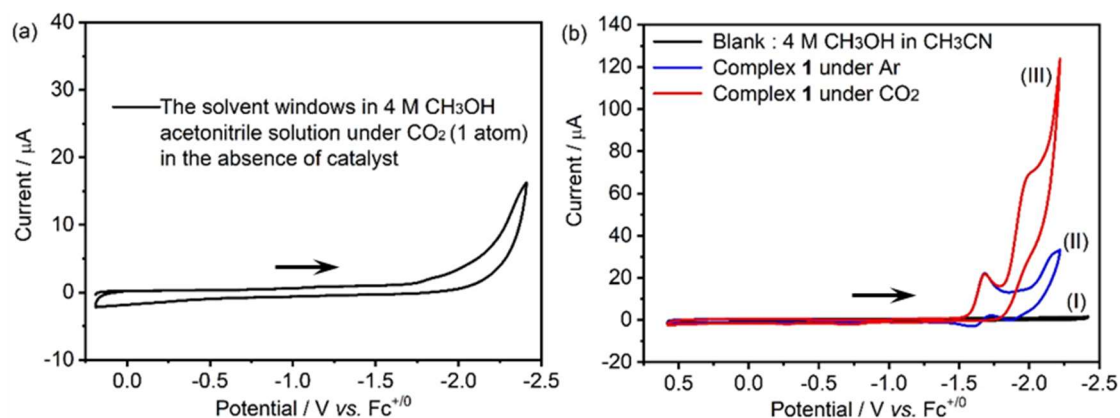

**Figure S12.** (a) The solvent windows in 4 M CH<sub>3</sub>OH CH<sub>3</sub>CN solution under CO<sub>2</sub>. (b) Cyclic voltammogram of complex 1 (1.0 mM) in CH<sub>3</sub>CN solution with 4 M CH<sub>3</sub>OH at a scan rate of 100 mV/s under Ar (I) without (II) with complex 1; (III) under CO<sub>2</sub>.

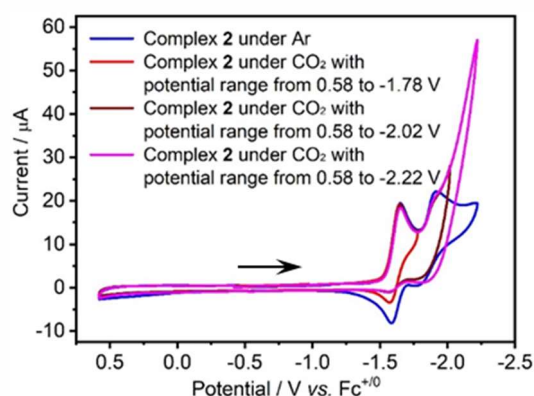

**Figure S13.** Cyclic voltammograms of complex 2 (1.0 mM) in acetonitrile solution (0.1 M *n*Bu<sub>4</sub>NPF<sub>6</sub>) with varied scan range.

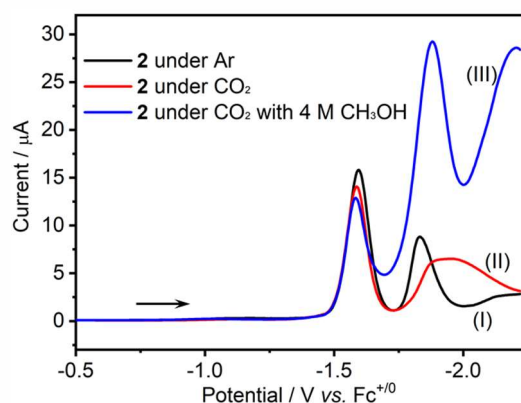

**Figure S14.** Differential pulse voltammograms of complex **2** (1.0 mM) in acetonitrile solution (0.1 M  $n\text{Bu}_4\text{NPF}_6$ ) with a scan rate of 4 mV/s (I) under Ar or under  $\text{CO}_2$  (b) without and (III) with 4 M methanol.

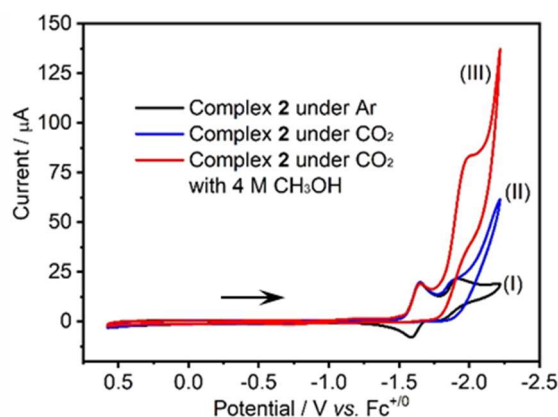

**Figure S15.** Cyclic voltammogram of complex **2** (1.0 mM) in acetonitrile solution (0.1 M  $n\text{Bu}_4\text{NPF}_6$ ) with a scan rate of 100 mV/s (I) under Ar or under  $\text{CO}_2$  (II) in the absence of and (III) in the presence of 4 M methanol.

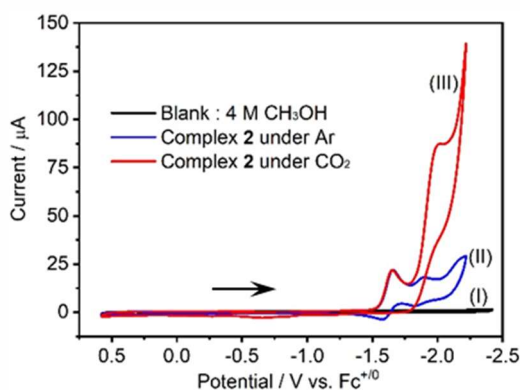

**Figure S16.** Cyclic voltammogram of complex **2** (1.0 mM) in acetonitrile solution (0.1 M  $n\text{Bu}_4\text{NPF}_6$ ) with 4 M methanol at a scan rate of 100 mV/s. Under Ar (I) without (II) with complex **2** (1.0 mM); (III) under  $\text{CO}_2$  (1 atm).



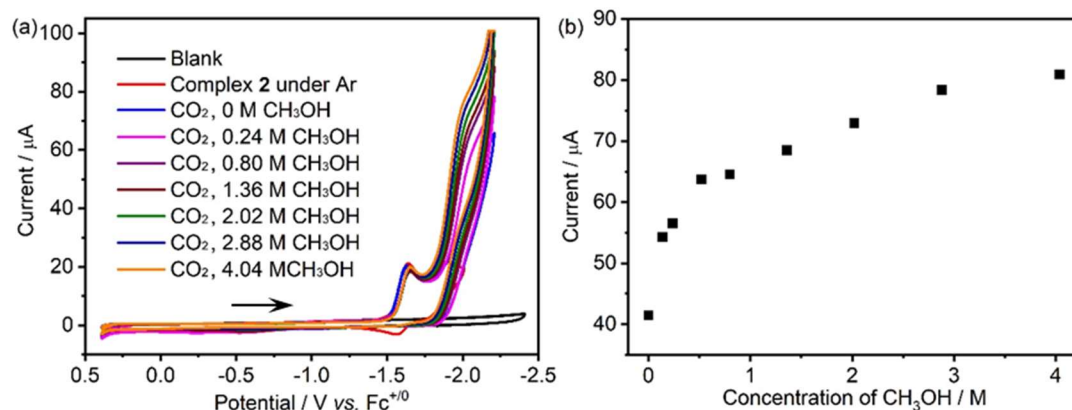

**Figure S17.** (a) Cyclic voltammogram of complex **2** (1.0 mM) in acetonitrile solution with varying concentration of methanol at a scan rate of 100 mV/s under CO<sub>2</sub>; (b) The trend of catalytic peak current with increasing methanol concentration at -2 V.

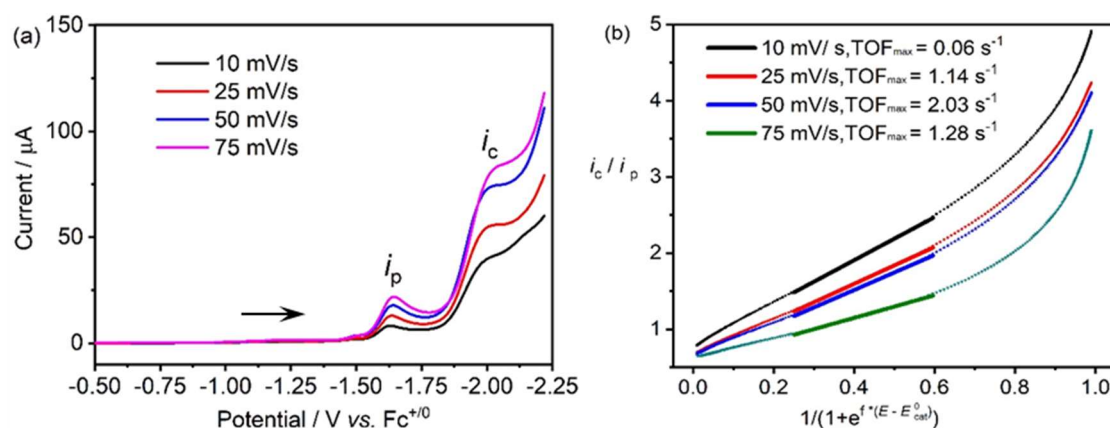

**Figure S18.** (a) Cyclic voltammogram of complex **1** (1 mM) with 4 M MeOH in acetonitrile solution under CO<sub>2</sub> with scan rate varied from 10 mV/s to 75 mV/s; (b) Foot-of-the-wave- analyses of the voltammograms with varied scan rate from 10 mV/s to 75 mV/s, respectively.

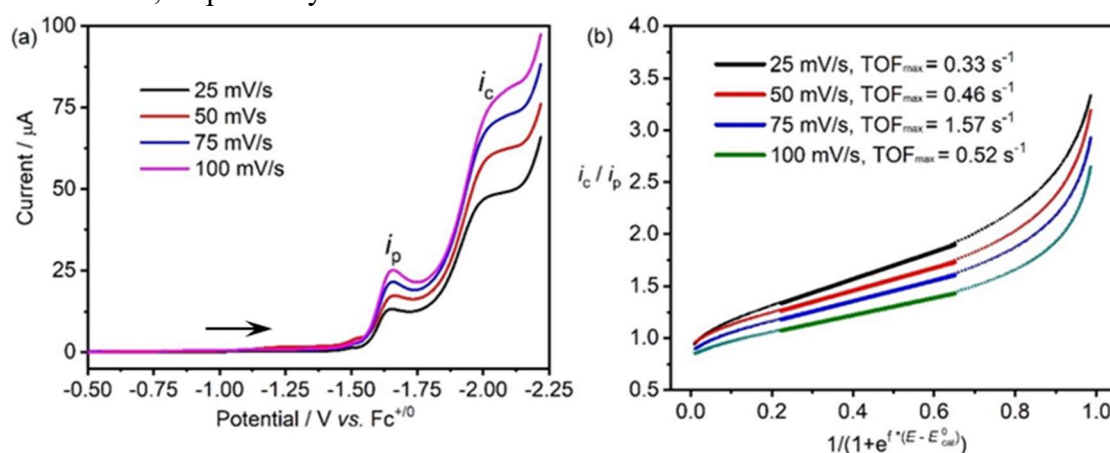

**Figure S19.** (a) Cyclic voltammogram of complex **2** (1 mM) with 4 M MeOH in acetonitrile solution under CO<sub>2</sub> with scan rate varied from 10 mV/s to 75 mV/s; (b) Foot-of-the-wave- analyses of the voltammograms with varied scan rate from 10 mV/s to 75 mV/s, respectively.

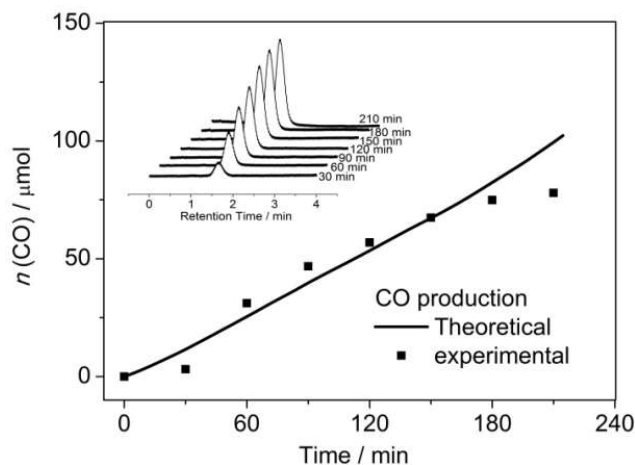

**Figure S20.** CO production detected by gas chromatograph (■) and in theory (line) as electrolysis time goes on. The theoretical production was transformed from electrolysis data. Inset: CO concentration detected per 30 min. CPE of complex **1** is performed at  $-2.1 \text{ V}$  (vs.  $\text{Fc}^{+/0}$ ). Conditions:  $0.1 \text{ M } n\text{Bu}_4\text{NPF}_6$ ; working electrode = glassy carbon; counter electrode = Pt gauze; reference electrode =  $\text{Ag}/\text{AgCl}$ .

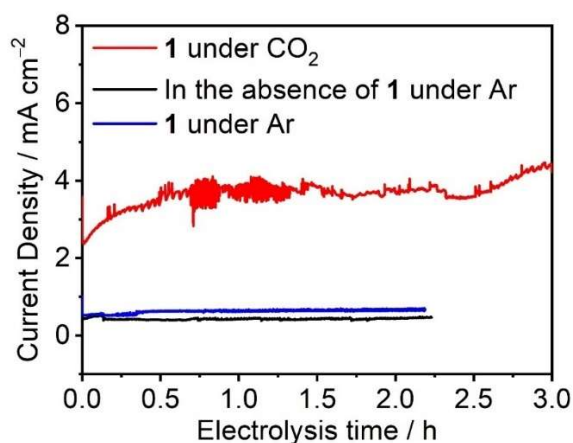

**Figure S21.** CPE current density over time in the absence (black line) and presence of  $1 \text{ mM}$  complex **1** under  $\text{CO}_2$  (red line) or Ar (blue line) at  $-2.1 \text{ V}$  vs.  $\text{Fc}^{+/0}$ .

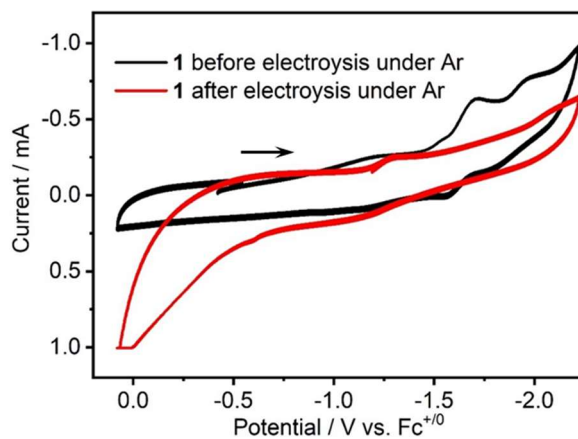

**Figure S22.** Cyclic voltammogram of complex **1** ( $1.0 \text{ mM}$ ) before and after electrolysis for 3 hours under Ar in  $\text{CH}_3\text{CN}$  solution ( $0.1 \text{ M } n\text{Bu}_4\text{NPF}_6$ ) with a scan rate of  $100 \text{ mV/s}$ .

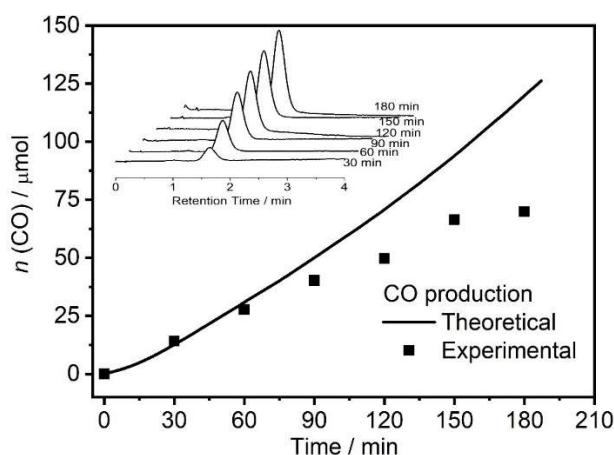

**Figure S23.** Gas chromatography analysis of CO production in theory (line) and experiment (■) as electrolysis time goes on. Inset: CO concentration detected per 30 min. CPE of complex **2** was run at  $-2.1 \text{ V vs. Fc}^{+/0}$ . Conditions:  $0.1 \text{ M } ^t\text{Bu}_4\text{NPF}_6$ ; working electrode = glassy carbon; counter electrode = Pt gauze; reference electrode = Ag/AgCl.

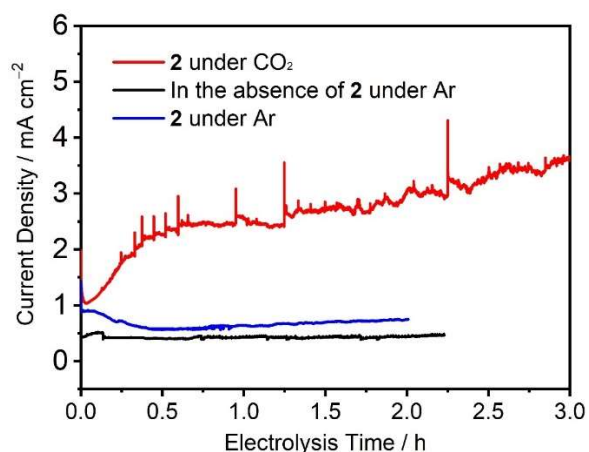

**Figure S24.** CPE current density over time for in the absence (black line) and presence  $1 \text{ mM}$  complex **2** under  $\text{CO}_2$  (red line) or Ar (blue line) at  $-2.1 \text{ V vs. Fc}^{+/0}$ .

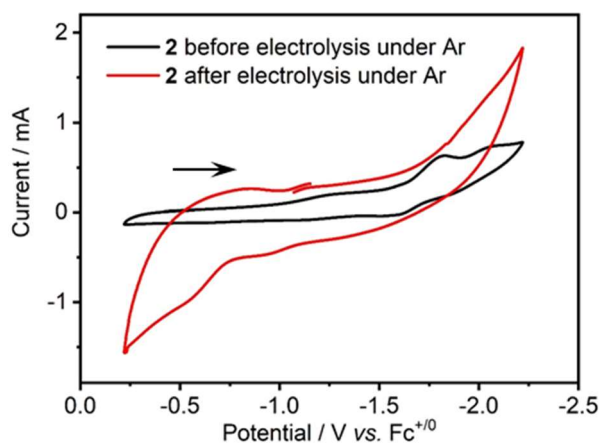

**Figure S25.** Cyclic voltammogram of complex **2** ( $1.0 \text{ mM}$ ) before and after electrolysis for 3 hours under Ar in  $^t\text{Bu}_4\text{NPF}_6$  acetonitrile solution ( $0.1 \text{ M}$ ) with a scan rate of  $100 \text{ mV/s}$ .

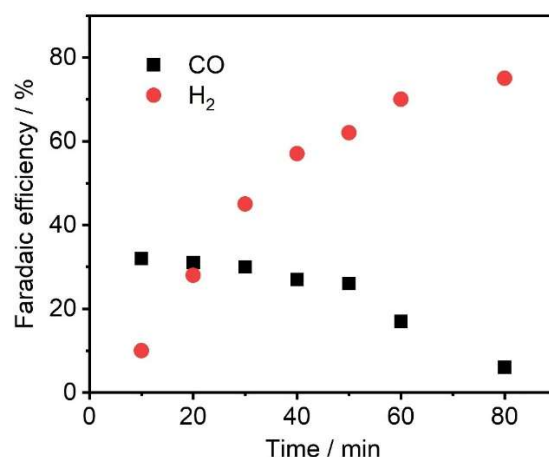

**Figure S26.** CO and H<sub>2</sub> production detected by gas chromatograph (■) and in theory (line) as electrolysis time goes on. The theoretical production was transformed from electrolysis data. Inset: CO and H<sub>2</sub> concentration detected per 10 min. CPE of complex **1** is performed at  $-2.1$  V (vs.  $\text{Fc}^{+/0}$ ) under CO<sub>2</sub> with 4 M methanol.

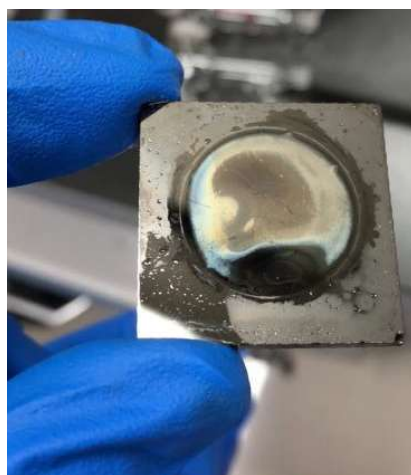

**Figure S27.** The photograph of GC electrode after CPE of complex **1** at  $-2.1$  V (vs.  $\text{Fc}^{+/0}$ ) under CO<sub>2</sub> in the presence of 4 M methanol for 80 min.

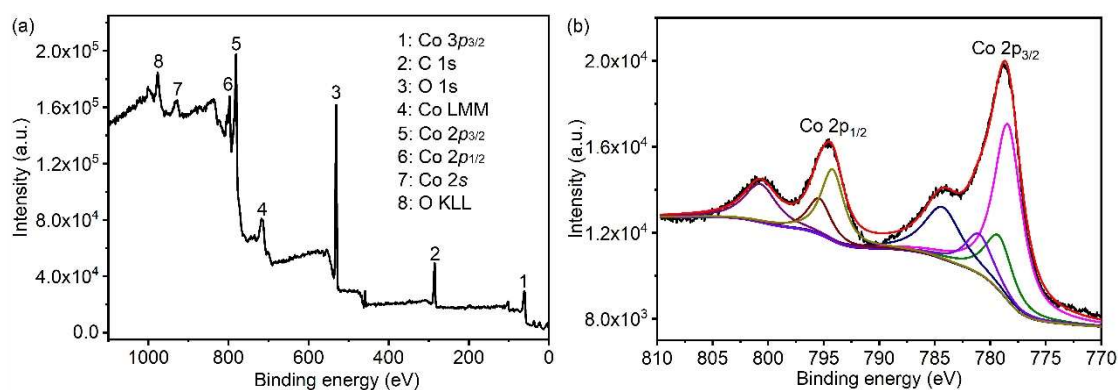

**Figure S28.** (a) XPS curves of the surface deposits on glassy carbon electrodes, which are formed by the deposition of complex **1** in CH<sub>3</sub>CN solution under CO<sub>2</sub> with 4 M methanol at a applied potential of  $-2.1$  V.

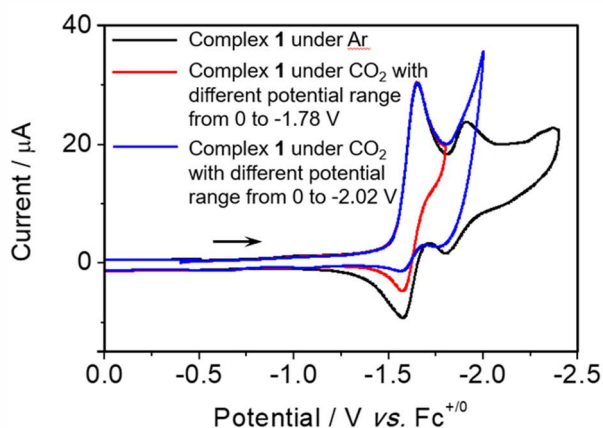

**Figure S29.** Cyclic voltammograms of complex **1** in CH<sub>3</sub>CN with varied scan range.

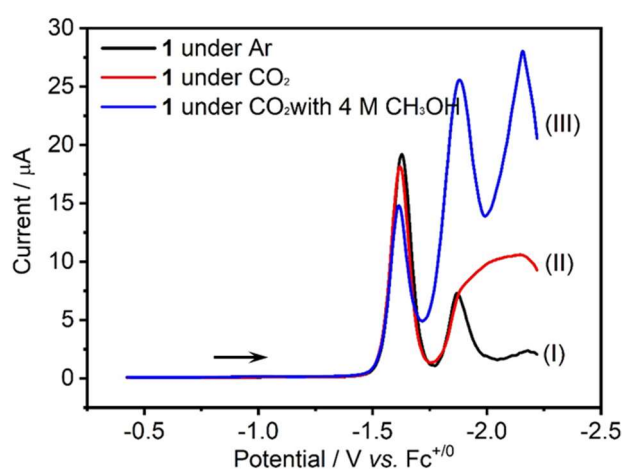

**Figure S30.** Differential pulse voltammograms of complex **1** (1.0 mM) in *t*Bu<sub>4</sub>NPF<sub>6</sub> acetonitrile solution (0.1 M) with a scan rate of 4 mV/s. (a) under Ar; under CO<sub>2</sub> (1 atm) (b) without and (c) with 4 M methanol.

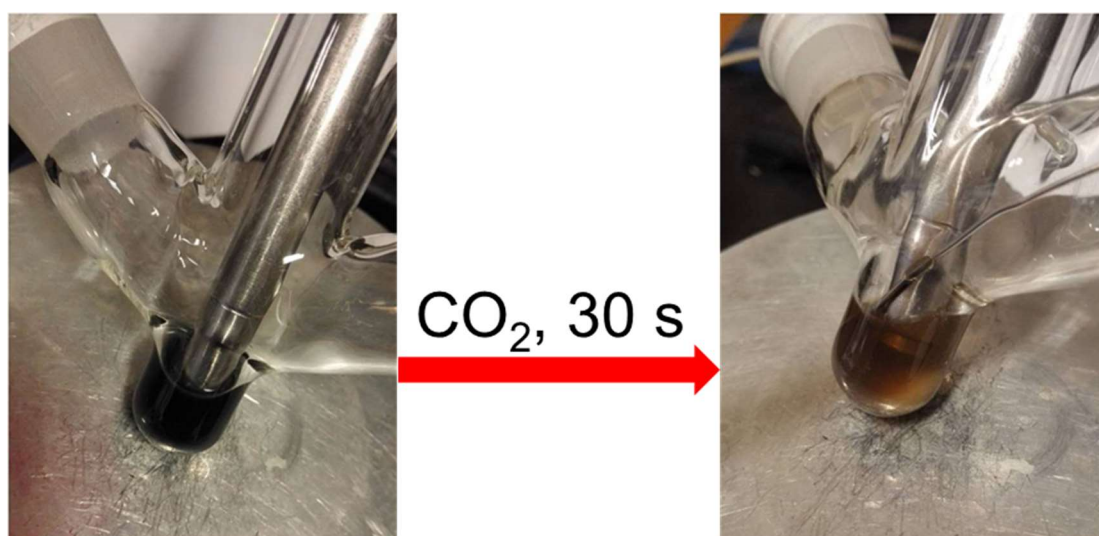

**Figure S31.** Freshly prepared [Co<sup>0</sup>(L<sup>1</sup>)]<sup>0</sup> (dark blue) solution in acetonitrile/THF (1:1) was bubbled with dry CO<sub>2</sub> gas for 30 s.



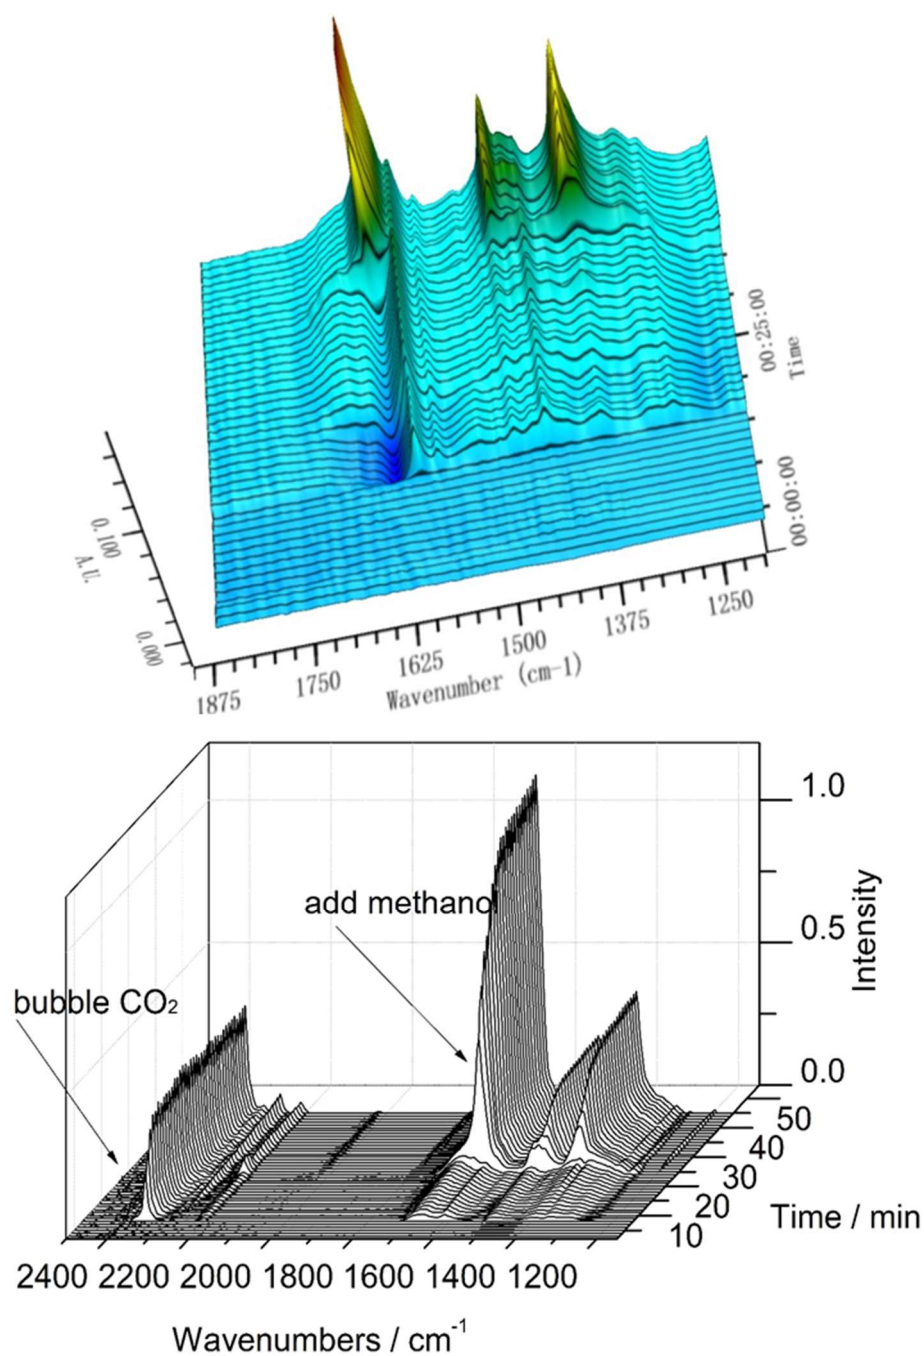

**Figure S32.** Freshly prepared  $[\text{Co}^0(\text{L}^1)]^0$  (dark blue) solution in acetonitrile/THF (1:1) mixture was bubbled with dry  $\text{CO}_2$  gas, then added with 2 M  $\text{CH}_3\text{OH}$ . The process was monitored by IR *in situ*. Origin drawing by METLER TOLEDO (above), handled by origin software (down).

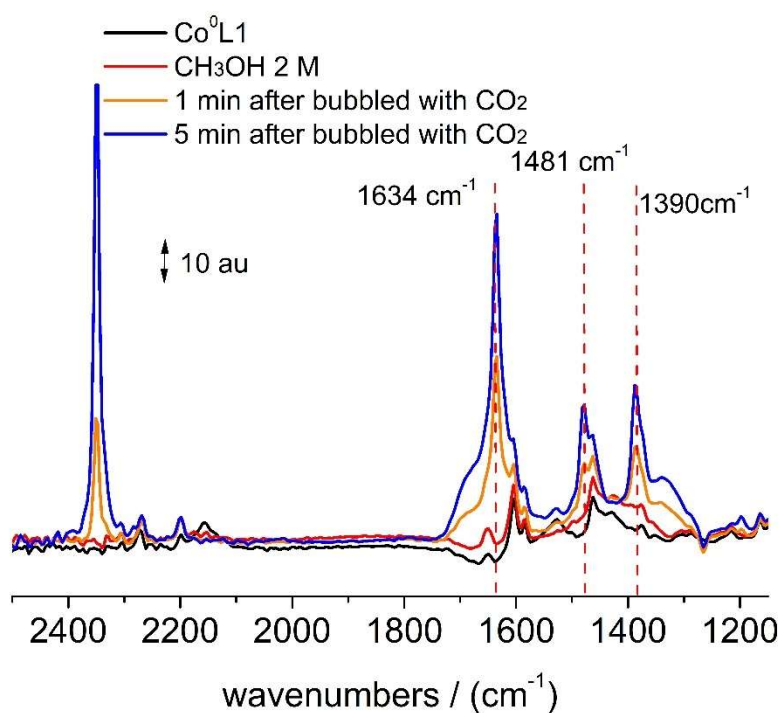

**Figure S33.** IR spectrum of freshly prepared  $[\text{Co}^0(\text{L}^1)]^0$  (black line), which is added with 2 M methanol (red line), then bubbled with dry  $\text{CO}_2$  (blue line). These lines were recorded by *in situ* FTIR during reaction process. The tests are performed in  $\text{CH}_3\text{CN}$  /THF (1:1) mixture under Ar with 10.0 mM  $[\text{Co}^0(\text{L}^1)]^0$ .

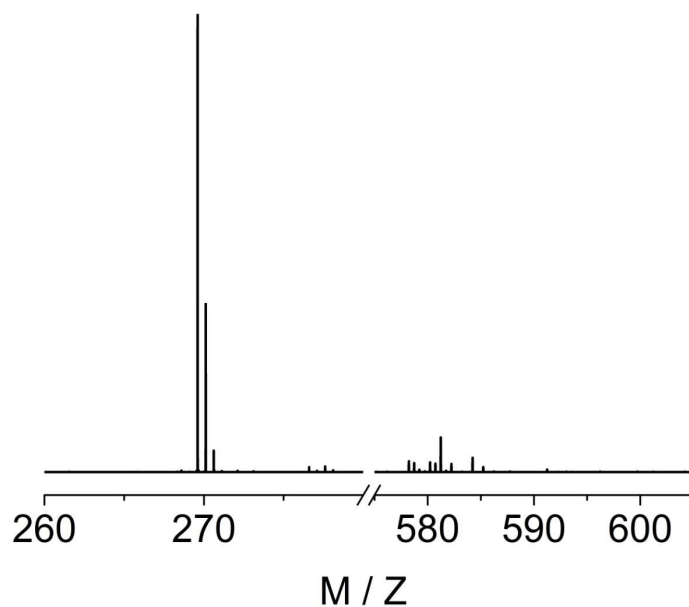

**Figure S34.** The full high resolution mass spectrometry (HR-MS) of  $\text{CO}_2$  coordinated  $[\text{Co}^0(\text{L}^1)]^0$  complex  $[\text{Co}^{\text{II}}(\text{L}^1)-\text{CO}^{2-}]^0$ .

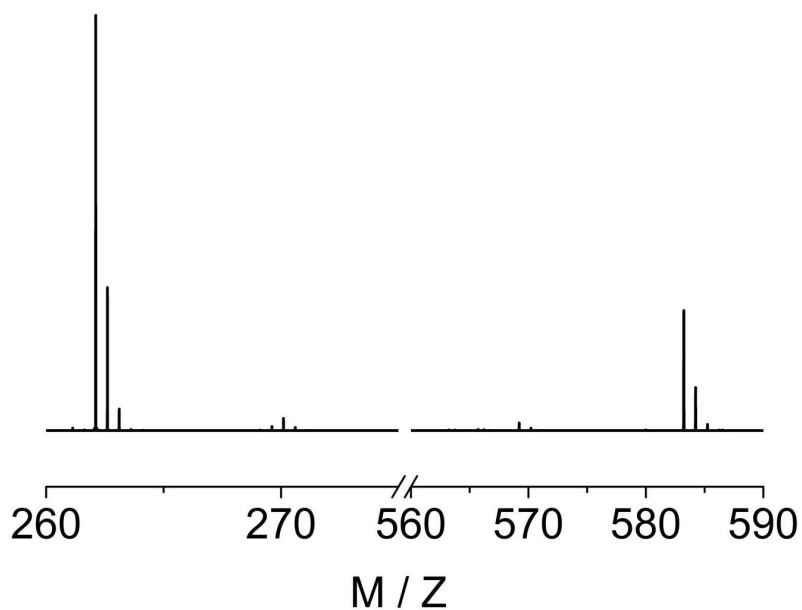

**Figure S35.** The full high resolution mass spectrometry (HR-MS) of CO<sub>2</sub> coordinated [Co<sup>0</sup>(L<sup>2</sup>)]<sup>0</sup> complex [Co<sup>II</sup>(L<sup>2</sup>)-CO<sup>2-</sup>]<sup>0</sup>.

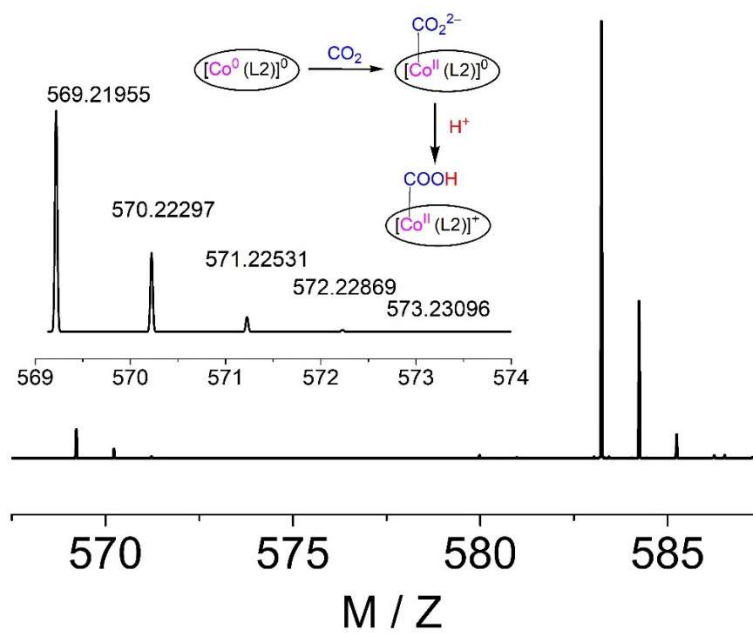

**Figure S36.** The observed and calculated (inset) high resolution mass spectra (HR-MS) of the protonated product of [Co<sup>II</sup>(L<sup>2</sup>)-CO<sup>2-</sup>]<sup>0</sup> generated from CO<sub>2</sub> coordinating to [Co<sup>0</sup>L<sup>2</sup>]<sup>0</sup>.



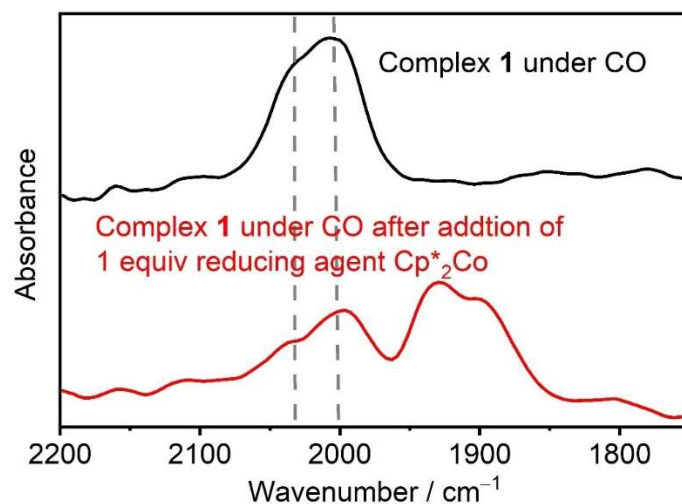

**Figure S37.** IR absorption spectra of complex **1** under CO atmosphere and recorded after reduction of complex **1** (6.0 mM) by 1 equiv of Cp\*<sub>2</sub>Co under CO atmosphere in CH<sub>3</sub>CN solution.

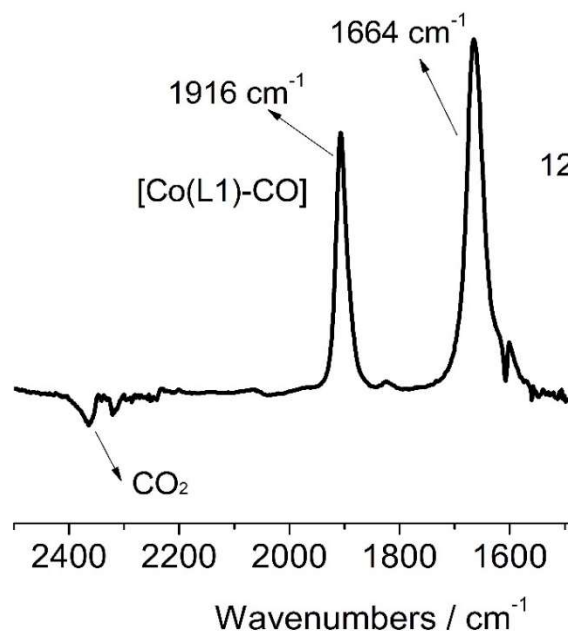

**Figure S38.** Differential IR-SEC spectrum of **1** (10.0 mM) recorded after electrolysis at  $-1.85$  V (vs. Fc<sup>+/0</sup>) for 10 s in CO<sub>2</sub> saturated CH<sub>3</sub>CN solution in the presence of 1 M CH<sub>3</sub>OH. The tests are performed in CH<sub>3</sub>CN with 0.1 M <sup>n</sup>Bu<sub>4</sub>NPF<sub>6</sub> as the supporting electrolyte.

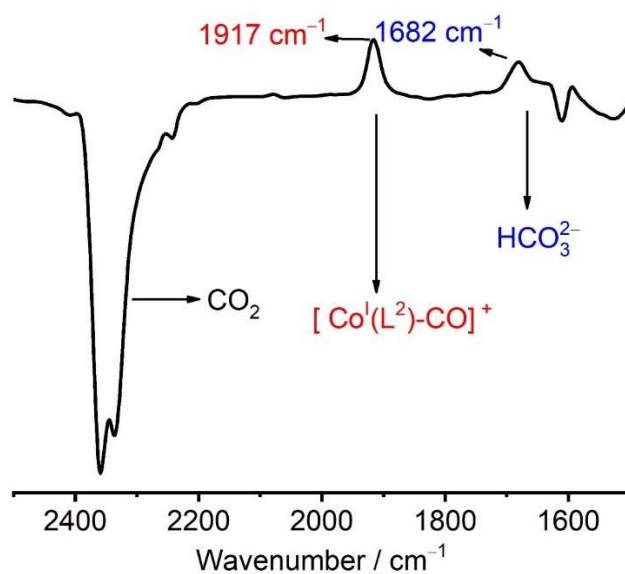

**Figure S39.** Differential absorbance IR spectra recorded after reduction of complex **2** (10.0 mM) at a potential of  $-1.85$  V (vs.  $\text{Fc}^{+/0}$ ) with varied electrolysis time in  $\text{CH}_3\text{CN}$  solution with  $0.1$  M  $n\text{-Bu}_4\text{NPF}_6$  as the supporting electrolyte

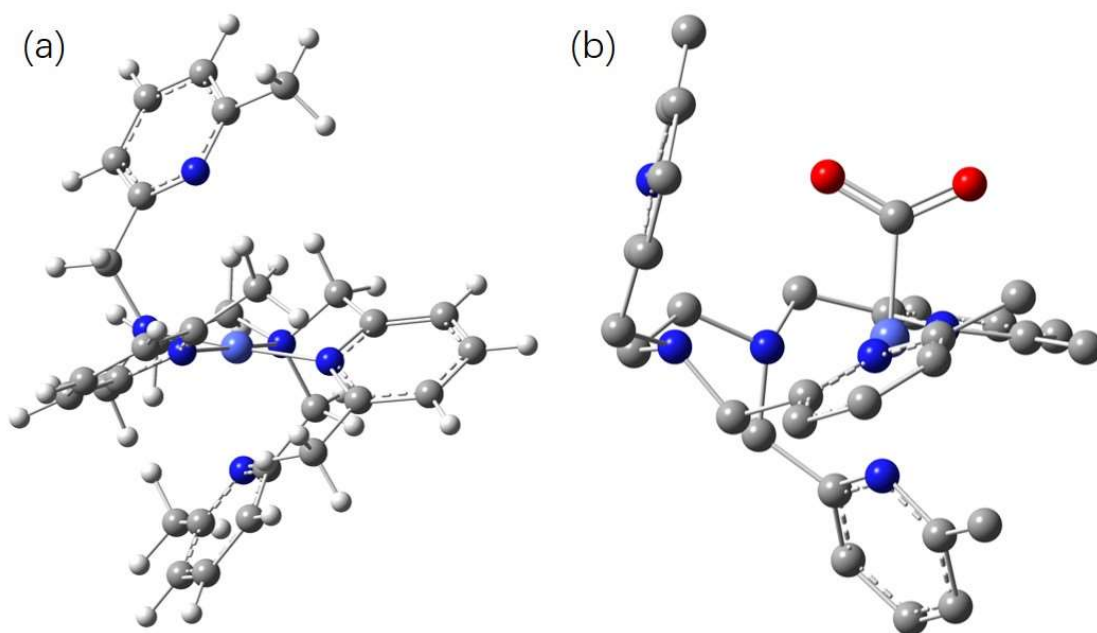

**Figure S40.** (a) The optimized structure of  $[\text{Co}^{\text{I}}(\text{L}^1)]^+$ . (b) the optimized structure of  $[\text{Co}^{\text{II}}(\text{L}^1)-\text{CO}_2^{2-}]^0$ .

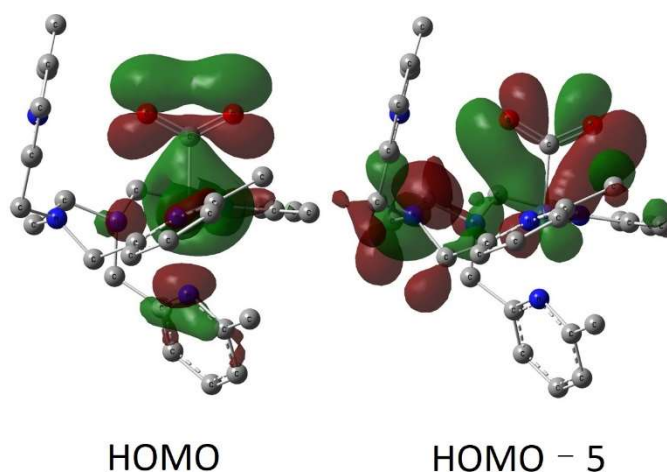

**Figure 41.** Calculated orbitals of  $[\text{Co}^{\text{II}}(\text{L}^1)\text{--CO}_2^{2-}]^0$  generated from  $\text{CO}_2$  coordinating to  $[\text{Co}^0 \text{L}^1]^0$ : (left) the HOMO orbital where  $\text{Co}(d_{z^2})$  forms a  $\sigma$  bond to the carbon atom of  $\text{CO}_2$ ; (right) the HOMO-5 orbital that forms  $\pi$  interactions between the  $d_{xz}$  or  $d_{yz}$  orbital of Co and the  $p$  orbitals of the oxygen atoms on  $\text{CO}_2$ . The Co-C and two C-O bonds distance are 1.915, 1.270, 1.266 Å respectively, the O-C-O bond angle is  $125.167^\circ$ . Co (light blue), C (gray), N (blue), O (red).

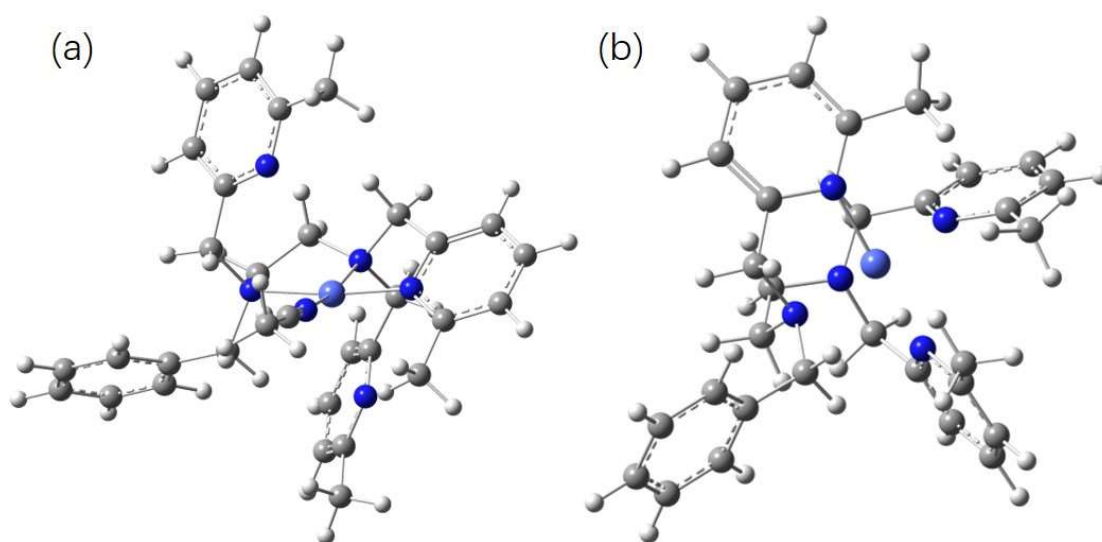

**Figure S42.** (a) The optimized structure of  $[\text{Co}^{\text{I}}(\text{L}^2)\text{--CH}_3\text{CN}]^+$  containing  $\text{CH}_3\text{CN}$  ligand; (b) The optimized structure of  $[\text{Co}^{\text{I}}(\text{L}^2)]^+$  in the absence of  $\text{CH}_3\text{CN}$  ligand.

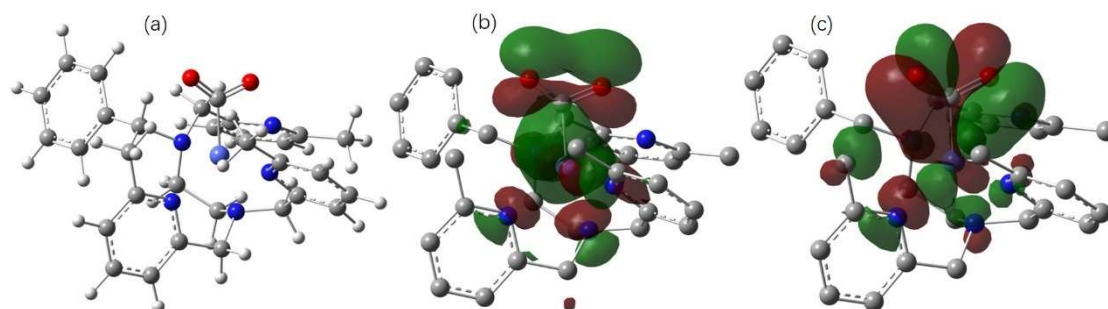

**Figure S43.** Calculated orbitals of  $[\text{Co}^{\text{II}}(\text{L}^2)\text{--CO}_2^{2-}]^0$  generated from  $\text{CO}_2$  coordinating to  $[\text{Co}^0 \text{L}^2]^0$ : (left) the HOMO orbital where  $\text{Co}(d_z^2)$  forms a  $\sigma$  bond to the carbon atom of  $\text{CO}_2$ ; (right) the HOMO-5 orbital that forms  $\pi$  interactions between the  $d_{xz}$  or  $d_{yz}$  orbital of Co and the  $p$  orbitals of the oxygen atoms on  $\text{CO}_2$ . The Co-C and two C-O bonds distance are 1.872, 1.283, 1.268 Å respectively, the O-C-O bond angle is  $124.594^\circ$ . Co (light blue), C (gray), H (white), N (blue), O (red).

**Table S1.** Selected Bond Lengths (Å) and Angles (deg) for **1** and **2**

| Complex      | <b>1</b>   | <b>2</b>   |
|--------------|------------|------------|
| Bond lengths |            |            |
| Co1—N1       | 2.193(5)   | 2.179(3)   |
| Co1—N2       | 2.164(5)   | 2.138(3)   |
| Co1—N3       | 2.147(5)   | 2.233(3)   |
| Co1—N4       | 2.186(5)   | —          |
| Co1—N5       | 2.292(5)   | 2.217(2)   |
| Co1—N6       | 2.326(5)   | 2.279(3)   |
| Bond angles  |            |            |
| N5—Co1—N6    | 167.87(17) | 168.76(10) |
| N1—Co1—N2    | 75.22(19)  | 77.14(10)  |
| N1—Co1—N3    | 155.15(18) | 157.43(10) |
| N1—Co1—N4    | 129.29(19) | —          |
| N2—Co1—N3    | 80.38(18)  | 81.44(10)  |
| N4—Co1—N2    | 155.44(19) | —          |
| N4—Co1—N3    | 75.29(18)  | —          |
| N5—Co1—N1    | 89.44(18)  | 93.12(9)   |
| N5—Co1—N2    | 79.44(19)  | 81.28(10)  |
| N5—Co1—N3    | 90.71(18)  | 90.57(9)   |
| N5—Co1—N4    | 97.36(18)  | —          |
| N6—Co1—N1    | 95.06(18)  | 93.92(10)  |
| N6—Co1—N2    | 90.81(18)  | 91.76(11)  |
| N6—Co1—N3    | 80.48(18)  | 79.61(10)  |
| N6—Co1—N4    | 88.51(17)  | —          |

**Table S2.** Crystallographic Data and Processing Parameters for **1** and **2**

| Complex                                        | <b>1</b>                                                                         | <b>2</b>                                                                       |
|------------------------------------------------|----------------------------------------------------------------------------------|--------------------------------------------------------------------------------|
| Empirical formula                              | C <sub>31</sub> H <sub>36</sub> B <sub>2</sub> CoF <sub>8</sub> N <sub>6</sub> O | C <sub>32</sub> H <sub>38</sub> B <sub>2</sub> CoF <sub>8</sub> N <sub>6</sub> |
| Formula weight                                 | 741.21                                                                           | 739.23                                                                         |
| Crystal system                                 | Monoclinic                                                                       | Monoclinic                                                                     |
| Space group                                    | P2(1)/c                                                                          | <i>Cc</i>                                                                      |
| <i>a</i> / nm                                  | 8.5421(7)                                                                        | 11.2603(6)                                                                     |
| <i>b</i> / nm                                  | 21.4163(17)                                                                      | 17.3222(10)                                                                    |
| <i>c</i> / nm                                  | 18.5232(14)                                                                      | 17.9924(13)                                                                    |
| $\beta$ / (°)                                  | 102.653(5)                                                                       | 102.974(2)                                                                     |
| <i>V</i> / nm <sup>3</sup>                     | 3.3063(5)                                                                        | 3.4199(4)                                                                      |
| <i>Z</i>                                       | 4                                                                                | 4                                                                              |
| <i>D<sub>c</sub></i> / (g · cm <sup>-3</sup> ) | 1.489                                                                            | 1.436                                                                          |
| $\mu$ / mm <sup>-1</sup>                       | 0.601                                                                            | 0.578                                                                          |
| <i>T</i> (K)                                   | 296(2)                                                                           | 296(2)                                                                         |
| F(000)                                         | 1524                                                                             | 1524                                                                           |
| Crystal size / mm <sup>3</sup>                 | 0.23 × 0.21 × 0.18                                                               | 0.31 × 0.25 × 0.21                                                             |
| $\theta$ range / (°)                           | 2.07 < $\theta$ < 25.00                                                          | 2.24 < $\theta$ < 25.00                                                        |
| Reflections collected                          | 18587                                                                            | 43104                                                                          |
| Unique reflections                             | 13308                                                                            | 5719                                                                           |
| <i>R</i> <sub>int</sub>                        | 0.0866                                                                           | 0.0207                                                                         |
| GOF                                            | 1.029                                                                            | 1.042                                                                          |
| Final <i>R</i> indices                         | <i>R</i> 1 = 0.0789,                                                             | <i>R</i> 1 = 0.0412,                                                           |
| [ <i>I</i> > 2σ( <i>I</i> )]                   | <i>wR</i> 2 = 0.2177                                                             | <i>wR</i> 2 = 0.1140                                                           |
| <i>R</i> indices (all data)                    | <i>R</i> 1 = 0.1301,<br><i>wR</i> 2 = 0.2394                                     | <i>R</i> 1 = 0.0424,<br><i>wR</i> 2 = 0.1140                                   |

**Table S3.** Redox Potentials ( $E_{1/2}$ ) of Complexes **1** and **2**.

| Complex  | Co <sup>III/II</sup> | Co <sup>II/I</sup> | Co <sup>I/0</sup> | $\Delta E$ <sup>[a]</sup> |
|----------|----------------------|--------------------|-------------------|---------------------------|
| <b>1</b> | —                    | −1.66              | −1.89             | 0.23                      |
| <b>2</b> | —                    | −1.64              | −1.87             | 0.23                      |

**Table S4.** Electrochemical Studies of **1** and **2**

| Complex  | $i_{\text{cat}}/i_{\text{p}}$ | $TOF_{\text{cv}}$ (s <sup>−1</sup> ) | $TON_{\text{total}}$ | $TOF_{\text{average}}$ (h <sup>−1</sup> ) |
|----------|-------------------------------|--------------------------------------|----------------------|-------------------------------------------|
| <b>1</b> | 5.5                           | 2.59                                 | 9.5                  | 2.03                                      |
| <b>2</b> | 5.2                           | 1.57.                                | 8.8                  | 1.57                                      |

**Geometry optimized xyz coordinates for [Co<sup>I</sup>(L<sup>1</sup>)]<sup>+</sup> from Gaussian calculations.**

|    |          |          |          |
|----|----------|----------|----------|
| Co | 0.195533 | -0.46386 | 0.069544 |
| N  | -4.01194 | 1.18325  | -0.80304 |
| N  | -0.76307 | 0.584028 | -1.29663 |
| N  | 0.358485 | -1.73839 | -1.33257 |
| N  | 2.728255 | 1.931743 | -0.00236 |
| C  | -3.23542 | 0.087863 | -0.83194 |
| C  | -2.09225 | 0.104705 | -1.82365 |
| H  | -1.93855 | -0.90374 | -2.20978 |
| H  | -2.37473 | 0.754593 | -2.66119 |
| N  | -0.05355 | 1.028029 | 1.332709 |
| C  | -0.86046 | 1.985674 | -0.78354 |
| H  | -1.68051 | 2.526362 | -1.26818 |
| H  | 0.069008 | 2.503177 | -1.02188 |
| C  | 0.249224 | 0.41894  | -2.38935 |
| H  | 1.151954 | 0.957988 | -2.08998 |
| H  | -0.09797 | 0.840517 | -3.34355 |
| C  | 0.508199 | -1.06536 | -2.51473 |
| C  | -1.07517 | 1.935766 | 0.728553 |
| H  | -1.02463 | 2.940956 | 1.164099 |
| H  | -2.0631  | 1.535176 | 0.953979 |
| C  | 1.904791 | 2.61143  | 0.814227 |
| C  | 1.134926 | 1.80387  | 1.837862 |
| H  | 1.820026 | 1.084029 | 2.287627 |
| H  | 0.779553 | 2.473093 | 2.632481 |
| C  | 0.34375  | -3.09806 | -1.37127 |
| C  | -5.05782 | 1.220589 | 0.044445 |
| C  | -0.58595 | 0.215691 | 2.47515  |
| H  | -1.56766 | -0.16883 | 2.185045 |
| C  | 1.799804 | 4.005489 | 0.781357 |
| H  | 1.140191 | 4.524602 | 1.469557 |
| C  | -3.48098 | -1.03225 | -0.02877 |
| H  | -2.84278 | -1.90689 | -0.09888 |
| C  | 3.469167 | 2.608999 | -0.8968  |
| C  | -5.35946 | 0.147107 | 0.891744 |
| H  | -6.21026 | 0.206214 | 1.56337  |
| C  | -4.56231 | -0.99563 | 0.849511 |
| H  | -4.78505 | -1.84693 | 1.486425 |
| C  | 3.406429 | 4.006192 | -1.00163 |
| H  | 4.0171   | 4.523961 | -1.73461 |
| C  | 2.562745 | 4.711476 | -0.14894 |
| H  | 2.502223 | 5.794565 | -0.20297 |
| C  | 0.644448 | -3.78607 | -2.55221 |
| H  | 0.642449 | -4.87162 | -2.53974 |



|   |          |          |          |
|---|----------|----------|----------|
| C | 0.79458  | -1.69699 | -3.71277 |
| H | 0.906066 | -1.11171 | -4.61979 |
| C | 0.909721 | -3.09042 | -3.72622 |
| H | 1.146779 | -3.61902 | -4.64407 |
| H | -0.71584 | 0.817664 | 3.385857 |
| C | 0.4009   | -0.90531 | 2.703918 |
| C | 0.69064  | -1.42973 | 3.951929 |
| C | 2.102592 | -2.1391  | 1.681966 |
| C | 1.699032 | -2.3922  | 4.057386 |
| H | 0.151023 | -1.07811 | 4.825285 |
| H | 1.944526 | -2.83667 | 5.016671 |
| C | 2.425927 | -2.71309 | 2.916746 |
| H | 3.270589 | -3.39285 | 2.971539 |
| N | 1.036907 | -1.30201 | 1.559277 |
| C | 4.387977 | 1.792925 | -1.77166 |
| H | 5.148931 | 1.290499 | -1.16291 |
| H | 3.829556 | 1.011289 | -2.29878 |
| H | 4.896231 | 2.416709 | -2.51177 |
| C | -0.0715  | -3.84971 | -0.13376 |
| H | -0.55042 | -3.17006 | 0.572734 |
| H | -0.77938 | -4.64117 | -0.40182 |
| H | 0.772895 | -4.33257 | 0.370367 |
| C | -5.89458 | 2.475401 | 0.024777 |
| H | -5.26822 | 3.358386 | 0.193312 |
| H | -6.3731  | 2.602259 | -0.95365 |
| H | -6.6759  | 2.449869 | 0.789111 |
| C | 2.973413 | -2.38448 | 0.477688 |
| H | 4.026925 | -2.36869 | 0.775388 |
| H | 2.786331 | -3.35853 | 0.012783 |
| H | 2.806621 | -1.60951 | -0.2717  |

**Geometry optimized xyz coordinates for  $[\text{Co}^{\text{II}}(\text{L}^1)\text{--CO}_2^{2-}]^0$  from Gaussian calculations.**

Symbolic Z-matrix:

Charge = 0 Multiplicity = 2

|    |          |          |          |
|----|----------|----------|----------|
| Co | -0.82188 | -0.07648 | 0.51442  |
| N  | 4.1329   | -1.41291 | -0.51687 |
| N  | 1.94615  | -0.10432 | -1.95055 |
| N  | 0.75515  | 1.32239  | 0.69139  |
| N  | -2.04061 | 1.20125  | -0.86916 |
| C  | 4.30327  | -0.21426 | -1.09285 |
| C  | 3.36579  | 0.12281  | -2.24604 |
| H  | 3.54156  | 1.16168  | -2.56065 |
| H  | 3.65671  | -0.50081 | -3.10081 |
| N  | -0.93341 | -1.38053 | -1.47552 |
| C  | 1.25989  | -1.044   | -2.83415 |
| H  | 2.00759  | -1.71887 | -3.26183 |
| H  | 0.7946   | -0.53291 | -3.69702 |
| C  | 1.17316  | 1.11936  | -1.74102 |
| H  | 0.11883  | 0.86775  | -1.77953 |
| H  | 1.36621  | 1.85857  | -2.5399  |
| C  | 1.42351  | 1.78172  | -0.40759 |
| C  | 0.27092  | -1.97255 | -2.12566 |
| H  | -0.05337 | -2.72617 | -2.86544 |
| H  | 0.80862  | -2.4787  | -1.32277 |
| C  | -2.59068 | 0.4818   | -1.87406 |
| C  | -1.80231 | -0.68403 | -2.44138 |
| H  | -2.48652 | -1.38471 | -2.94194 |
| H  | -1.17505 | -0.26654 | -3.23604 |
| C  | 1.02228  | 1.94699  | 1.87675  |
| C  | 4.9364   | -1.7725  | 0.49871  |
| C  | -1.66065 | -2.51834 | -0.87548 |
| H  | -0.9412  | -3.04065 | -0.23755 |
| C  | -3.78382 | 0.84753  | -2.49881 |
| H  | -4.19492 | 0.22105  | -3.28411 |
| C  | 5.31201  | 0.67046  | -0.69656 |
| H  | 5.42213  | 1.6336   | -1.18604 |
| C  | -2.61914 | 2.38528  | -0.54467 |
| C  | 5.9709   | -0.94425 | 0.95436  |
| H  | 6.60662  | -1.26457 | 1.77433  |
| C  | 6.16241  | 0.29203  | 0.34105  |
| H  | 6.95548  | 0.95606  | 0.67456  |
| C  | -3.81015 | 2.81232  | -1.1395  |
| H  | -4.24727 | 3.75849  | -0.83824 |

|   |          |          |          |
|---|----------|----------|----------|
| C | -4.41759 | 2.02311  | -2.11152 |
| H | -5.35182 | 2.32961  | -2.57262 |
| C | 1.94007  | 3.00149  | 1.9743   |
| H | 2.1119   | 3.45113  | 2.94652  |
| C | 2.3164   | 2.85113  | -0.36248 |
| H | 2.78799  | 3.18268  | -1.28145 |
| C | 2.59374  | 3.47491  | 0.84832  |
| H | 3.29412  | 4.30253  | 0.90908  |
| H | -2.00928 | -3.21597 | -1.65315 |
| C | -2.81168 | -2.08873 | -0.01375 |
| C | -4.01511 | -2.78883 | -0.00613 |
| C | -3.50277 | -0.71577 | 1.73005  |
| C | -4.99847 | -2.42775 | 0.91105  |
| H | -4.16473 | -3.60755 | -0.70232 |
| H | -5.9487  | -2.95224 | 0.94445  |
| C | -4.72705 | -1.38831 | 1.79422  |
| H | -5.45507 | -1.08716 | 2.54033  |
| N | -2.56003 | -1.0481  | 0.81339  |
| C | -1.91931 | 3.27651  | 0.44781  |
| H | -0.92474 | 3.54855  | 0.07999  |
| H | -2.48927 | 4.19495  | 0.60912  |
| H | -1.78142 | 2.78783  | 1.41498  |
| C | 0.2837   | 1.55466  | 3.12487  |
| H | 0.11947  | 0.47589  | 3.18653  |
| H | 0.83434  | 1.89655  | 4.00638  |
| H | -0.6985  | 2.04361  | 3.15638  |
| C | 4.65359  | -3.11388 | 1.13042  |
| H | 3.61829  | -3.14656 | 1.48998  |
| H | 4.76582  | -3.91965 | 0.39509  |
| H | 5.32577  | -3.3158  | 1.96925  |
| C | -3.17411 | 0.38046  | 2.69874  |
| H | -3.90747 | 0.4204   | 3.50875  |
| H | -2.18135 | 0.18868  | 3.11291  |
| H | -3.16798 | 1.35815  | 2.20594  |
| C | -0.01669 | -1.40004 | 1.64139  |
| O | -0.3644  | -1.42538 | 2.86223  |
| O | 0.77706  | -2.2189  | 1.09231  |

**Geometry optimized xyz coordinates for  $[\text{Co}^{\text{I}}(\text{L}^2)\text{--CH}_3\text{CN}]^+$  from Gaussian calculations**

Symbolic Z-matrix:

Charge = 1 Multiplicity = 1

|    |          |          |          |
|----|----------|----------|----------|
| Co | 0.80199  | -0.31885 | 0.45958  |
| N  | -1.15249 | -3.01651 | -0.47544 |
| N  | 0.99894  | 0.27323  | 2.15615  |
| N  | 0.83445  | -0.69461 | -1.48611 |
| N  | 2.37056  | -1.41472 | 0.48942  |
| N  | 1.75354  | 2.87434  | -0.19079 |
| C  | -0.90262 | -2.57869 | -1.72123 |
| C  | 0.49639  | -2.07133 | -1.99749 |
| H  | 1.20271  | -2.76256 | -1.53417 |
| H  | 0.67891  | -2.07883 | -3.08001 |
| N  | -0.79093 | 0.87813  | 0.12295  |
| C  | 0.01863  | 0.36006  | -2.1578  |
| H  | -0.28403 | 0.04696  | -3.16481 |
| H  | 0.63759  | 1.24955  | -2.2705  |
| C  | 2.29953  | -0.48053 | -1.71406 |
| H  | 2.50176  | 0.58346  | -1.5681  |
| H  | 2.59803  | -0.74733 | -2.73708 |
| C  | 3.04346  | -1.29671 | -0.69203 |
| C  | -1.20251 | 0.66082  | -1.30104 |
| H  | -1.75372 | 1.52162  | -1.69653 |
| H  | -1.8805  | -0.19093 | -1.32723 |
| C  | 0.45103  | 3.0613   | -0.46376 |
| C  | -0.55716 | 2.33867  | 0.40834  |
| H  | -0.22586 | 2.40128  | 1.44604  |
| H  | -1.51535 | 2.86133  | 0.32257  |
| C  | 2.90467  | -2.21801 | 1.44884  |
| C  | -2.36185 | -3.53122 | -0.19259 |
| C  | -1.87225 | 0.37214  | 1.05965  |
| H  | -1.48727 | 0.519    | 2.0698   |
| H  | -1.92921 | -0.70367 | 0.88259  |
| C  | 0.01626  | 3.93788  | -1.46443 |
| H  | -1.04407 | 4.08639  | -1.64359 |
| C  | -1.85105 | -2.65083 | -2.74626 |
| H  | -1.60764 | -2.30783 | -3.74693 |
| C  | 2.67665  | 3.5355   | -0.91158 |
| C  | -3.37031 | -3.62471 | -1.16333 |
| H  | -4.33519 | -4.04986 | -0.90552 |
| C  | -3.10904 | -3.1793  | -2.45605 |
| H  | -3.86896 | -3.24967 | -3.22885 |

|   |          |          |          |
|---|----------|----------|----------|
| C | 2.31912  | 4.4121   | -1.94582 |
| H | 3.08822  | 4.92807  | -2.51205 |
| C | 0.9704   | 4.61712  | -2.22155 |
| H | 0.66497  | 5.29957  | -3.00943 |
| C | 4.11965  | 3.30012  | -0.53923 |
| H | 4.3123   | 3.64839  | 0.48242  |
| H | 4.80018  | 3.82496  | -1.2151  |
| H | 4.35811  | 2.2308   | -0.56468 |
| C | -3.2539  | 0.99173  | 0.94663  |
| C | 2.11038  | -2.50244 | 2.69544  |
| H | 1.04334  | -2.37166 | 2.50815  |
| H | 2.39446  | -1.83755 | 3.51873  |
| H | 2.29356  | -3.52908 | 3.02732  |
| C | 4.15819  | -2.81405 | 1.26969  |
| H | 4.55615  | -3.43894 | 2.06291  |
| C | 1.16989  | 0.7208   | 3.21834  |
| C | 4.27733  | -1.87976 | -0.92912 |
| H | 4.75948  | -1.75131 | -1.89265 |
| C | -2.58023 | -4.00968 | 1.22102  |
| H | -2.53488 | -3.16965 | 1.92465  |
| H | -1.79553 | -4.71671 | 1.51126  |
| H | -3.55149 | -4.49866 | 1.33438  |
| C | -4.23156 | 0.43508  | 0.10741  |
| H | -4.00261 | -0.455   | -0.47268 |
| C | -3.60633 | 2.10685  | 1.72395  |
| H | -2.87843 | 2.53367  | 2.40947  |
| C | 4.86713  | -2.63278 | 0.08803  |
| H | 5.83837  | -3.09592 | -0.05445 |
| C | -5.83649 | 2.11425  | 0.78676  |
| H | -6.83142 | 2.5464   | 0.7248   |
| C | -4.88217 | 2.6674   | 1.64344  |
| H | -5.13186 | 3.52985  | 2.25536  |
| C | -5.50904 | 0.99193  | 0.02299  |
| H | -6.25029 | 0.54246  | -0.63213 |
| C | 1.40174  | 1.28371  | 4.54173  |
| H | 2.07027  | 2.14901  | 4.47988  |
| H | 1.8592   | 0.53433  | 5.19624  |
| H | 0.45472  | 1.60332  | 4.98843  |

### Geometry optimized xyz coordinates for $[\text{Co}^{\text{I}}(\text{L}^2)]^+$ from Gaussian calculations

Symbolic Z-matrix:

Charge = 1 Multiplicity = 1

|    |          |          |          |
|----|----------|----------|----------|
| Co | -0.53403 | 0.17436  | -0.25452 |
| N  | -0.31322 | -1.87313 | -0.19201 |
| N  | -0.72802 | -0.0801  | 1.89687  |
| N  | -2.50664 | -0.14573 | -0.13562 |
| N  | -0.61657 | 2.07114  | -0.56263 |
| C  | -0.5442  | -2.42683 | 1.02287  |
| C  | -0.76954 | -1.51321 | 2.22021  |
| H  | -1.73828 | -1.7612  | 2.66836  |
| H  | -0.0213  | -1.75052 | 2.98732  |
| N  | 1.48647  | 0.41767  | 0.10543  |
| C  | 0.46017  | 0.62329  | 2.39561  |
| H  | 0.64998  | 0.41898  | 3.46008  |
| H  | 0.29204  | 1.69779  | 2.29431  |
| C  | -2.00681 | 0.60134  | 2.12378  |
| H  | -1.85055 | 1.67552  | 1.9786   |
| H  | -2.39336 | 0.46027  | 3.14356  |
| C  | -3.0041  | 0.09247  | 1.1107   |
| C  | 1.67307  | 0.19524  | 1.57939  |
| H  | 2.57134  | 0.71104  | 1.93638  |
| H  | 1.84084  | -0.87508 | 1.72428  |
| C  | 0.54397  | 2.68393  | -0.12098 |
| C  | 1.75847  | 1.83227  | -0.27056 |
| H  | 2.01652  | 1.82422  | -1.33718 |
| H  | 2.6175   | 2.23708  | 0.27544  |
| C  | -3.35262 | -0.64767 | -1.06947 |
| C  | -0.06536 | -2.70753 | -1.23873 |
| C  | 2.44373  | -0.47653 | -0.64859 |
| H  | 2.2309   | -0.3243  | -1.7075  |
| H  | 2.17364  | -1.5023  | -0.39889 |
| C  | 0.63362  | 3.9998   | 0.29641  |
| H  | 1.58814  | 4.37581  | 0.65273  |
| C  | -0.56984 | -3.80441 | 1.23125  |
| H  | -0.75986 | -4.19389 | 2.22668  |
| C  | -1.68201 | 2.93719  | -0.76013 |
| C  | -0.09087 | -4.09688 | -1.08942 |
| H  | 0.10235  | -4.72475 | -1.95326 |
| C  | -0.35142 | -4.65742 | 0.15552  |
| H  | -0.37454 | -5.73494 | 0.28676  |
| C  | -1.63321 | 4.27141  | -0.35377 |
| H  | -2.51054 | 4.88782  | -0.52773 |
| C  | -0.49236 | 4.82336  | 0.22536  |

|   |          |          |          |
|---|----------|----------|----------|
| H | -0.46379 | 5.85787  | 0.55088  |
| C | -2.89247 | 2.48067  | -1.53028 |
| H | -2.60573 | 1.77933  | -2.31848 |
| H | -3.36985 | 3.34486  | -2.00275 |
| H | -3.6509  | 1.99639  | -0.90831 |
| C | 3.92664  | -0.26583 | -0.39039 |
| C | -2.83371 | -0.94504 | -2.44668 |
| H | -1.94549 | -0.35088 | -2.66547 |
| H | -3.60138 | -0.74352 | -3.1999  |
| H | -2.56256 | -2.00331 | -2.53147 |
| C | -4.70132 | -0.8915  | -0.7801  |
| H | -5.34136 | -1.28801 | -1.56131 |
| C | -4.33217 | -0.12792 | 1.45144  |
| H | -4.66754 | 0.07743  | 2.46248  |
| C | 0.28441  | -2.12201 | -2.58219 |
| H | 0.18173  | -1.03511 | -2.56016 |
| H | -0.36051 | -2.52675 | -3.36865 |
| H | 1.31618  | -2.37738 | -2.85069 |
| C | 4.59375  | -0.99175 | 0.60876  |
| H | 4.04366  | -1.71015 | 1.2113   |
| C | 4.67791  | 0.61709  | -1.18162 |
| H | 4.19434  | 1.16316  | -1.98735 |
| C | -5.20542 | -0.62281 | 0.48409  |
| H | -6.24965 | -0.80508 | 0.71815  |
| C | 6.69056  | 0.07782  | 0.04844  |
| H | 7.75568  | 0.20992  | 0.21724  |
| C | 6.04548  | 0.79247  | -0.9632  |
| H | 6.6072   | 1.48     | -1.58955 |
| C | 5.96115  | -0.81991 | 0.83108  |
| H | 6.45685  | -1.39388 | 1.60917  |

**Geometry optimized xyz coordinates for  $[\text{Co}^{\text{II}}(\text{L}^2)\text{--CO}_2^{2-}]^0$  from Gaussian calculations.**

Symbolic Z-matrix:

Charge = 0 Multiplicity = 2

|    |          |          |          |
|----|----------|----------|----------|
| Co | -0.90469 | -0.2216  | -0.45642 |
| N  | -1.06651 | -2.19521 | 0.69918  |
| N  | -1.07819 | 0.4994   | 1.48964  |
| N  | -2.88228 | 0.20037  | -0.46448 |
| N  | 0.77989  | 3.36168  | -0.28881 |
| C  | -1.25716 | -1.92977 | 2.01342  |
| C  | -1.70409 | -0.52672 | 2.35155  |
| H  | -2.78615 | -0.48317 | 2.18776  |
| H  | -1.53516 | -0.30858 | 3.41434  |
| N  | 1.18618  | 0.0016   | -0.17686 |
| C  | 0.26788  | 0.9061   | 1.96922  |
| H  | 0.345    | 0.80094  | 3.05958  |
| H  | 0.40535  | 1.96031  | 1.7394   |
| C  | -1.98929 | 1.64736  | 1.27333  |
| H  | -1.41453 | 2.42384  | 0.75777  |
| H  | -2.35814 | 2.07366  | 2.21765  |
| C  | -3.14779 | 1.21319  | 0.40219  |
| C  | 1.35629  | 0.06276  | 1.3043   |
| H  | 2.34469  | 0.43808  | 1.59523  |
| H  | 1.28266  | -0.96245 | 1.6728   |
| C  | 1.83882  | 2.53425  | -0.21153 |
| C  | 1.74618  | 1.20081  | -0.92693 |
| H  | 1.11458  | 1.31876  | -1.80839 |
| H  | 2.76288  | 0.95111  | -1.2397  |
| C  | -3.90519 | -0.28413 | -1.21548 |
| C  | -0.81177 | -3.47403 | 0.33765  |
| C  | 1.8357   | -1.24771 | -0.72661 |
| H  | 1.53354  | -1.30813 | -1.77308 |
| H  | 1.35536  | -2.07975 | -0.21095 |
| C  | 3.02618  | 2.91042  | 0.42971  |
| H  | 3.87217  | 2.23068  | 0.45492  |
| C  | -1.14213 | -2.89305 | 3.01087  |
| H  | -1.28813 | -2.61952 | 4.05097  |
| C  | 0.85615  | 4.58396  | 0.26796  |
| C  | -0.68609 | -4.49418 | 1.29388  |
| H  | -0.46786 | -5.5049  | 0.96293  |
| C  | -0.8406  | -4.20445 | 2.64245  |
| H  | -0.7353  | -4.9812  | 3.39425  |
| C  | 2.00767  | 5.02347  | 0.93468  |



|   |          |          |          |
|---|----------|----------|----------|
| H | 2.03854  | 6.01709  | 1.37093  |
| C | 3.10591  | 4.17174  | 1.01687  |
| H | 4.01471  | 4.48953  | 1.52012  |
| C | -0.36663 | 5.45967  | 0.14729  |
| H | -0.7315  | 5.46909  | -0.88492 |
| H | -0.15698 | 6.48717  | 0.45722  |
| H | -1.18079 | 5.07603  | 0.77489  |
| C | 3.34374  | -1.38074 | -0.60136 |
| C | -3.67909 | -1.52539 | -2.03278 |
| H | -3.59855 | -2.39287 | -1.36457 |
| H | -2.75019 | -1.48442 | -2.60409 |
| H | -4.52196 | -1.69932 | -2.70766 |
| C | -5.17244 | 0.31034  | -1.18034 |
| H | -5.95993 | -0.09175 | -1.80922 |
| C | -4.39244 | 1.82523  | 0.49756  |
| H | -4.54695 | 2.62815  | 1.21112  |
| C | -0.69976 | -3.80735 | -1.12543 |
| H | -0.57798 | -2.91632 | -1.75041 |
| H | -1.61269 | -4.32607 | -1.45057 |
| H | 0.13246  | -4.49949 | -1.29978 |
| C | 3.94431  | -1.84905 | 0.57856  |
| H | 3.32315  | -2.11986 | 1.42815  |
| C | 4.17708  | -1.08952 | -1.69343 |
| H | 3.73215  | -0.75864 | -2.62901 |
| C | -5.42094 | 1.3836   | -0.33227 |
| H | -6.4019  | 1.8478   | -0.29665 |
| C | 6.14479  | -1.67945 | -0.41635 |
| H | 7.22288  | -1.79432 | -0.344   |
| C | 5.56349  | -1.23209 | -1.60434 |
| H | 6.18631  | -1.0005  | -2.46422 |
| C | 5.3296   | -1.99268 | 0.67432  |
| H | 5.7711   | -2.3585  | 1.59751  |
| C | -0.73198 | -0.33654 | -2.31782 |
| O | -0.83134 | 0.8882   | -2.68692 |
| O | -0.48591 | -1.30451 | -3.09864 |
